# Supplementary material for: N,S co-doped 3D mesoporous carbon–Co3Si2O5(OH)4 architectures for high-performance flexible pseudo-solid-state supercapacitors
Source: Royal Society of Chemistry journal article supplement (doi:10.1039/c7ta03004e), 2017-01-01
Supplement: c7ta03004e1.pdf [file c7ta03004e1.pdf]

## Supporting Information

### **N,S Co-doped 3D Mesoporous Carbon-Co<sub>3</sub>Si<sub>2</sub>O<sub>5</sub>(OH)<sub>4</sub> Architectures for High-Performance Flexible Pseudo-Solid-State Supercapacitor**

*Xinran Li<sup>a</sup>, Shiyuan Ding<sup>a</sup>, Xiao Xiao<sup>a</sup>, Jinying Shao<sup>a</sup>, Jilei Wei<sup>a</sup>, Huan Pang<sup>a\*</sup> and*

*Yan Yu<sup>b\*</sup>*

- a. College of Chemistry and Chemical Engineering, Yangzhou University Yangzhou, Jiangsu, 225002, Jiangsu, P. R. China, E-mail: [huanpangchem@hotmail.com](mailto:huanpangchem@hotmail.com); [panghuan@yzu.edu.cn](mailto:panghuan@yzu.edu.cn).*
- b. CAS Key Laboratory of Materials for Energy Conversion, Department of Materials Science and Engineering, University of Science and Technology of China, Hefei 230026, Hefei, P. R. China. E-mail: [yanyumse@ustc.edu.cn](mailto:yanyumse@ustc.edu.cn)*

## Calculations

The mass-specific capacitance ( $C/F\ g^{-1}$ ) of the device can also be calculated using :

$$C=Q / (m \times \Delta V) = \int Idt / (m \times \Delta V) = I \times t_{discharge} / (m \times \Delta V) \quad (1)$$

Where  $m$  is the mass of the activated materials,  $I$  is the discharge current,  $t_{discharge}$  is discharge time, and  $\Delta V$  is the potential drop during discharge.

The area-specific capacitance ( $C/mF\ cm^{-2}$ ) of the device can also be calculated using :

$$C=Q / (A \times \Delta V) = \int Idt / (A \times \Delta V) = I \times t_{discharge} / (A \times \Delta V) \quad (2)$$

Where  $A$  is the surface area of the device,  $I$  is the discharge current,  $t_{discharge}$  is discharge time, and  $\Delta V$  is the potential drop during discharge.

The energy density and power density of the device can be obtained from :

$$E=0.5C \times V^2 \quad (3)$$

$$P=E/t_{discharge} \quad (4)$$

Where  $V$  represents the operating voltage.

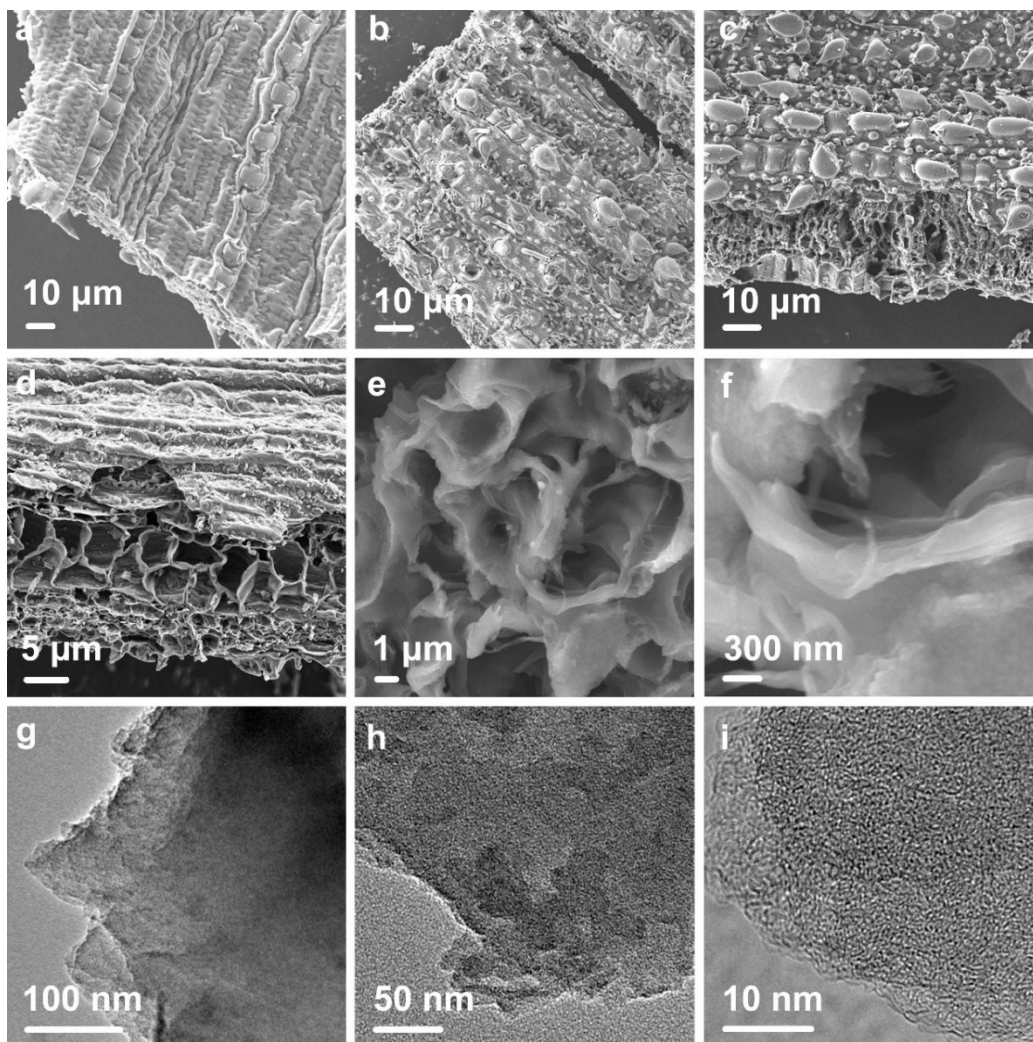

**Figure S1.** a-f) SEM images of as-prepared samples (N,S co-doped 3D mesoporous C-SiO<sub>2</sub> architectures), and g-i) Corresponding TEM images.

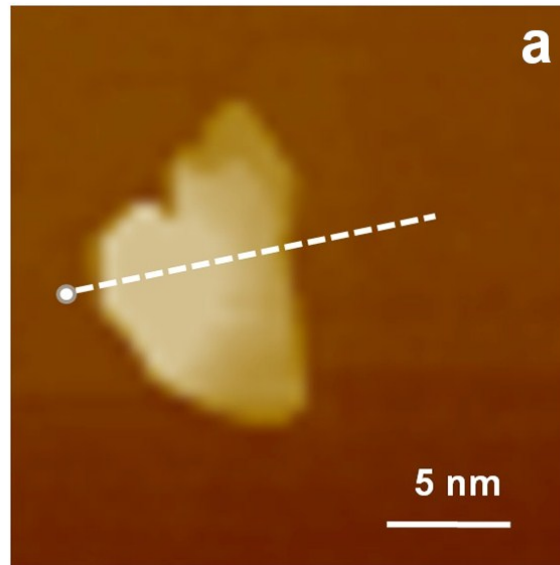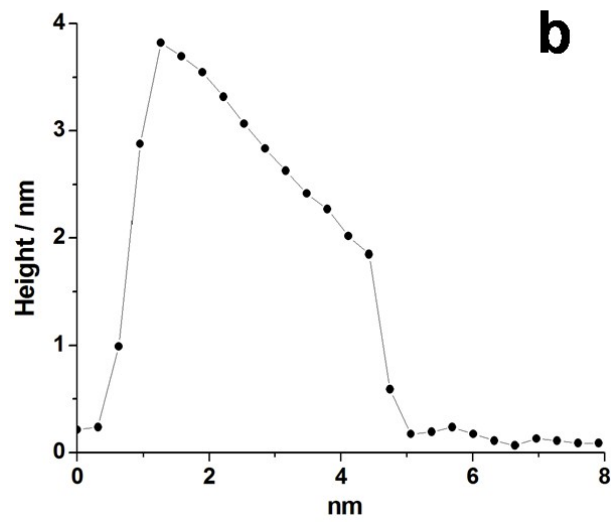

**Figure S2.** Atomic force microscope (AFM) image of  $\text{Co}_3\text{Si}_2\text{O}_5(\text{OH})_4$  ultrathin nanoflakes.

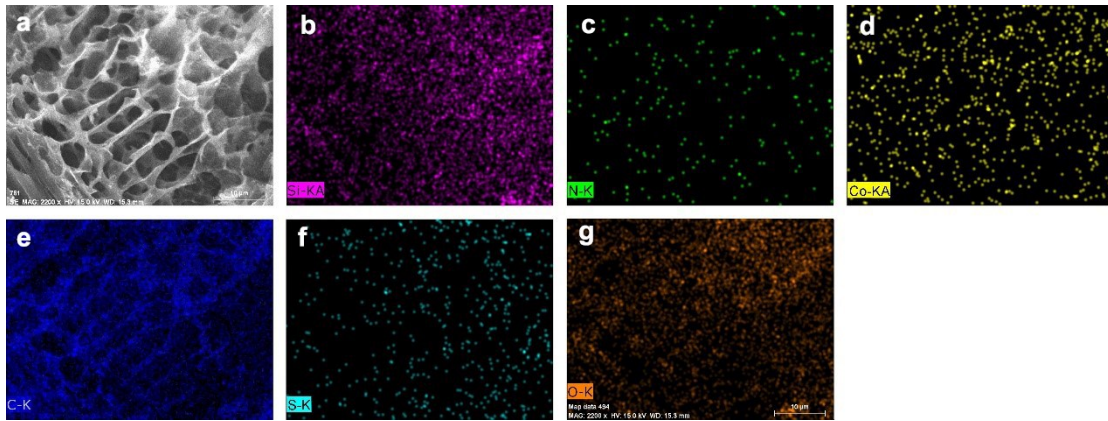

**Figure S3.** The corresponding EDS mappings of N,S co-doped 3D mesoporous C- $\text{Co}_3\text{Si}_2\text{O}_5(\text{OH})_4$  architectures: a) SEM image, b) Purple-Si-K, c) Green-N-K, d) Yellow-Co-K, e) Blue-C-K, f) Cyan-S-K, and g) Orange-O-K, respectively.

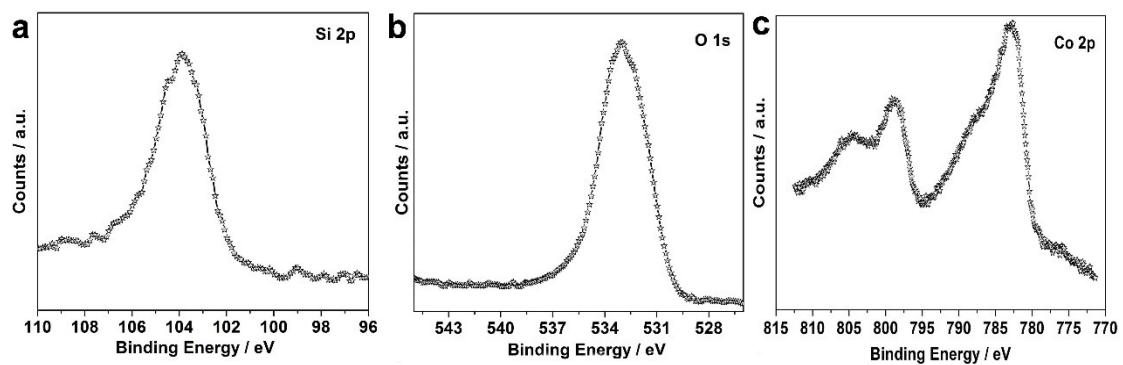

**Figure S4.** The high-resolution spectra of the N,S co-doped 3D mesoporous C- $\text{Co}_3\text{Si}_2\text{O}_5(\text{OH})_4$  architectures (a) Si 2p, (b) O 1s, and (c) Co 2p.

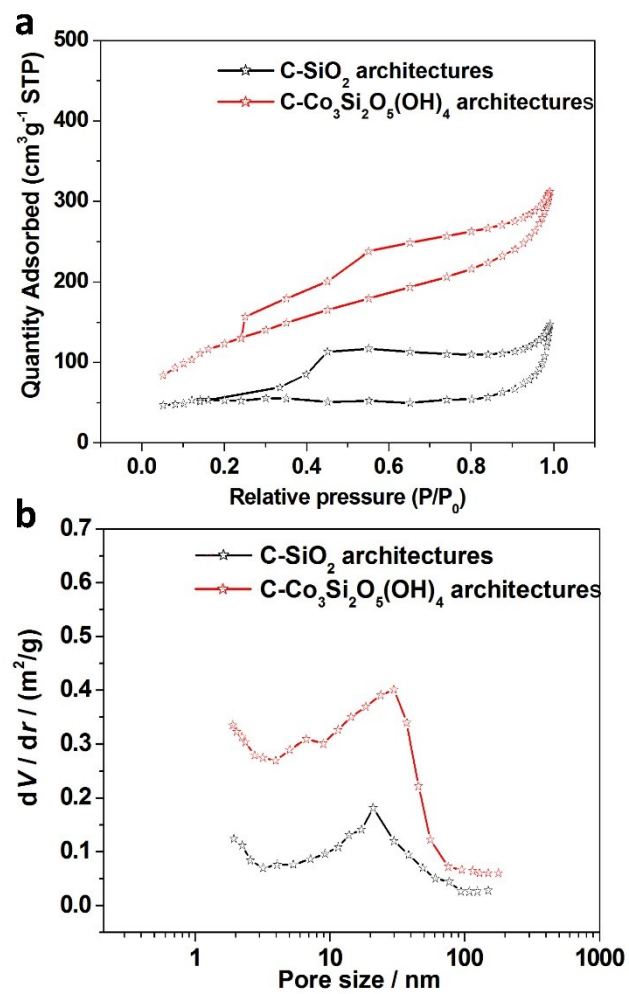

**Figure S5.** a) N<sub>2</sub> adsorption-desorption isotherm, and (b) the corresponding pore size distribution curve of as-prepared samples (3D mesoporous C-SiO<sub>2</sub> architectures, and N,S co-doped 3D mesoporous C-Co<sub>3</sub>Si<sub>2</sub>O<sub>5</sub>(OH)<sub>4</sub> architectures).

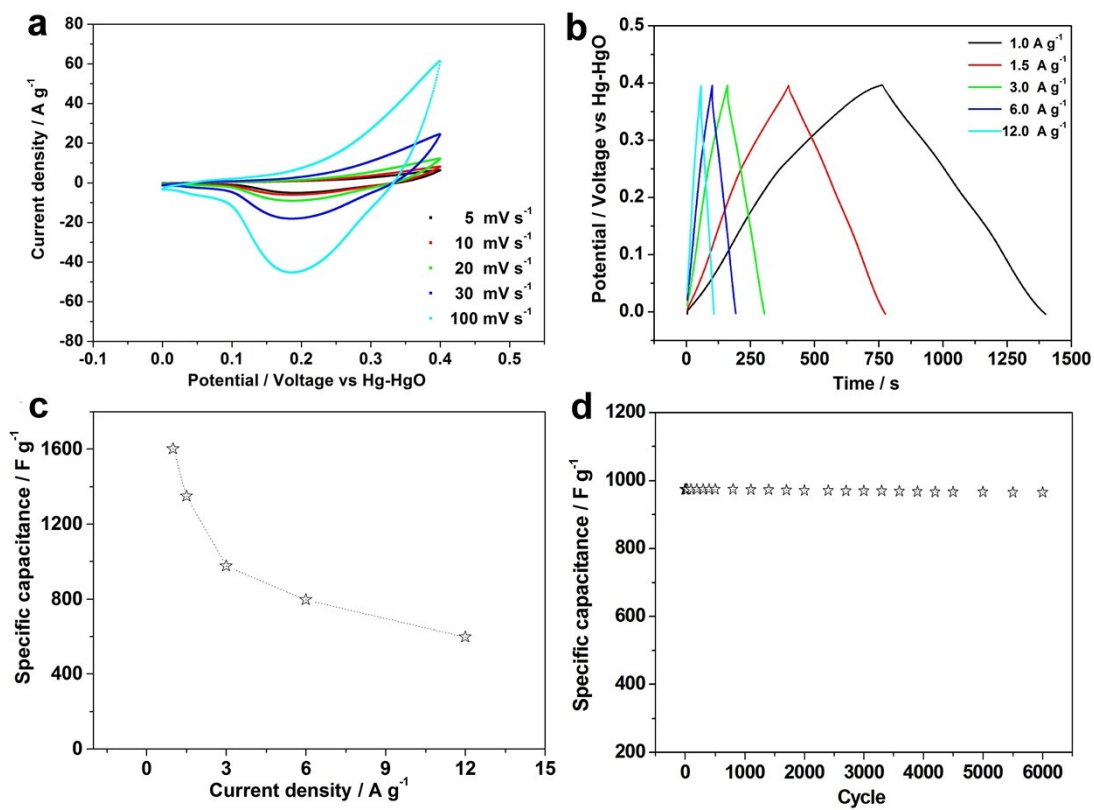

**Figure S6.** a) Cyclic voltammetry within 0 to 0.4 V range at different scan rates of 5-100  $\text{mV}\cdot\text{s}^{-1}$  was performed on the as-prepared electrodes in 3.0 M KOH at room temperature, b) The galvanostatic discharge curves at 1.0-12.0  $\text{A g}^{-1}$ , c) Specific capacitance obtained from different current densities, and d) Cycling performance of the device at 3.0  $\text{A g}^{-1}$  for 6000 cycles.



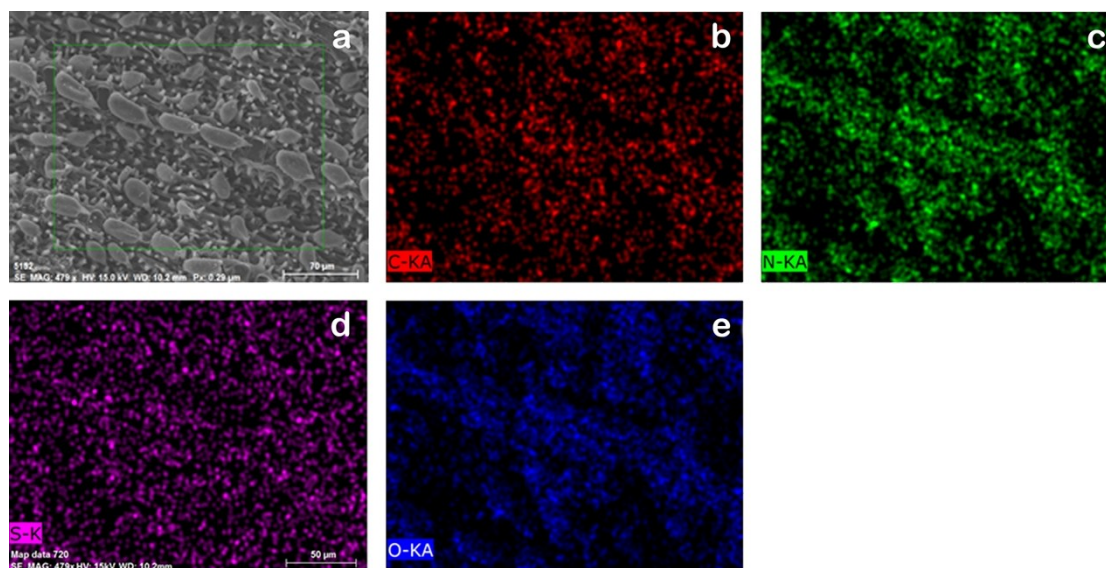

**Figure S7.** The corresponding EDS mappings of N,S co-doped pure carbon architectures (600 °C): a) SEM image, b) Red-C-K, c) Green-N-K, d) Purple-S-K, e) Blue-O-K, respectively.

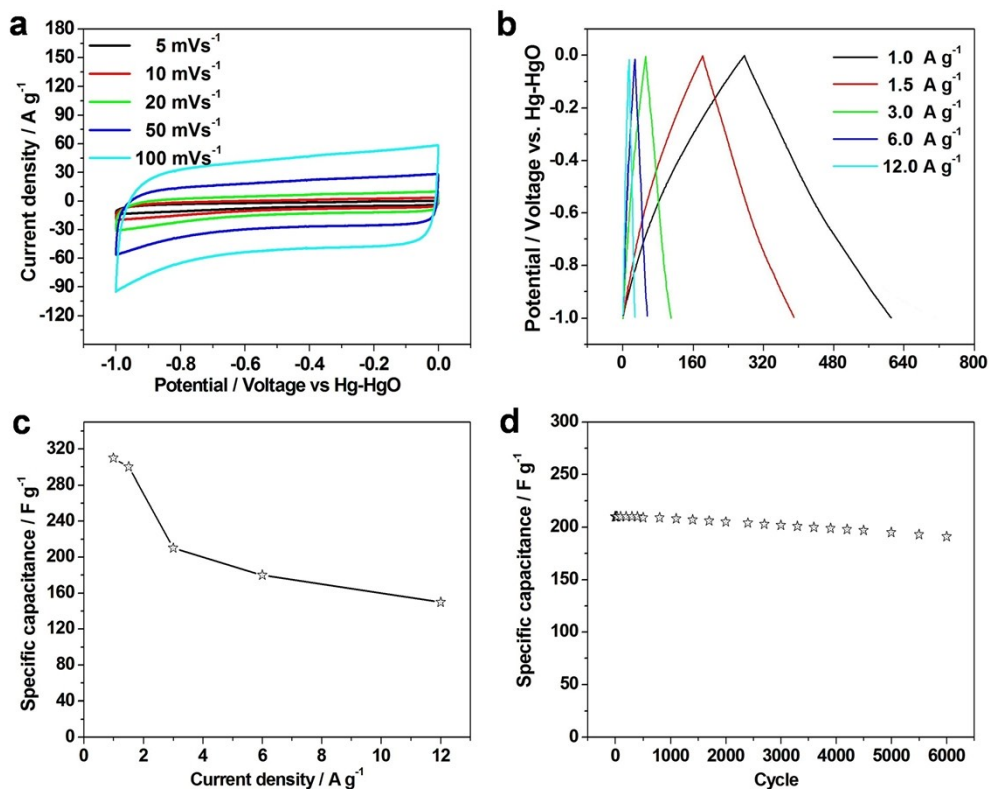

**Figure S8.** a) Cyclic voltammetry within -1.0 to 0 V range at different scan rates of 5-100  $\text{mV}\cdot\text{s}^{-1}$  was performed on the as-prepared N,S co-doped pure carbon architectures (600 °C) electrodes in 3.0 M KOH at room temperature, b) The galvanostatic discharge curves at 1.0-12.0  $\text{A g}^{-1}$ , c) Specific capacitance obtained from different current densities, and d) Cycling performance of the device at 3.0  $\text{A g}^{-1}$  for 6000 cycles.

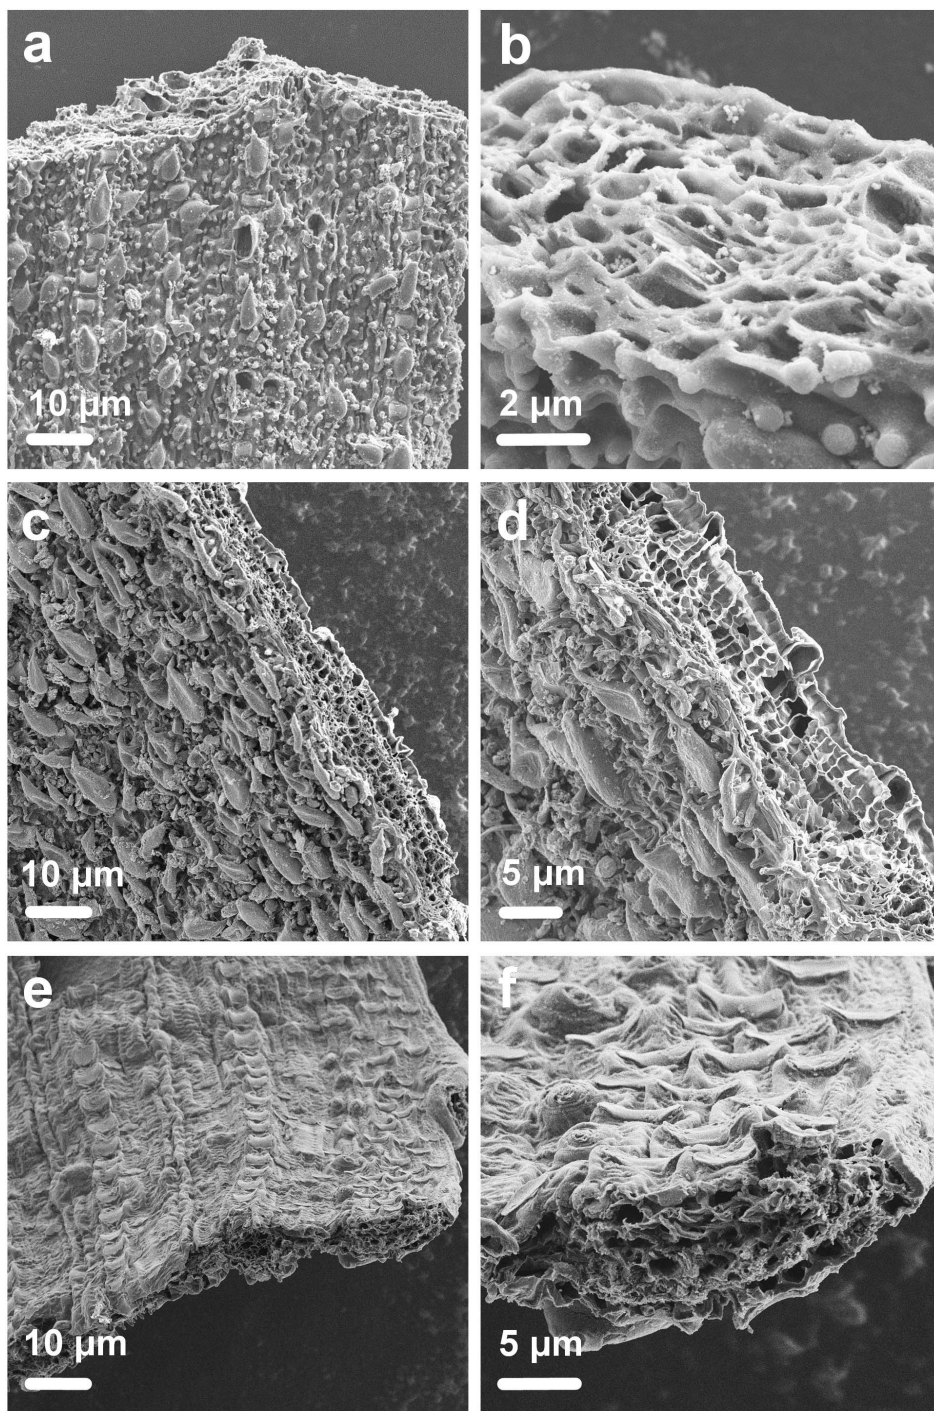

**Figure S9** SEM images of N,S co-doped pure carbon architectures obtained with different calcination temperatures: a, b) 600 °C, c, d) 800 °C and e, f) 900 °C.

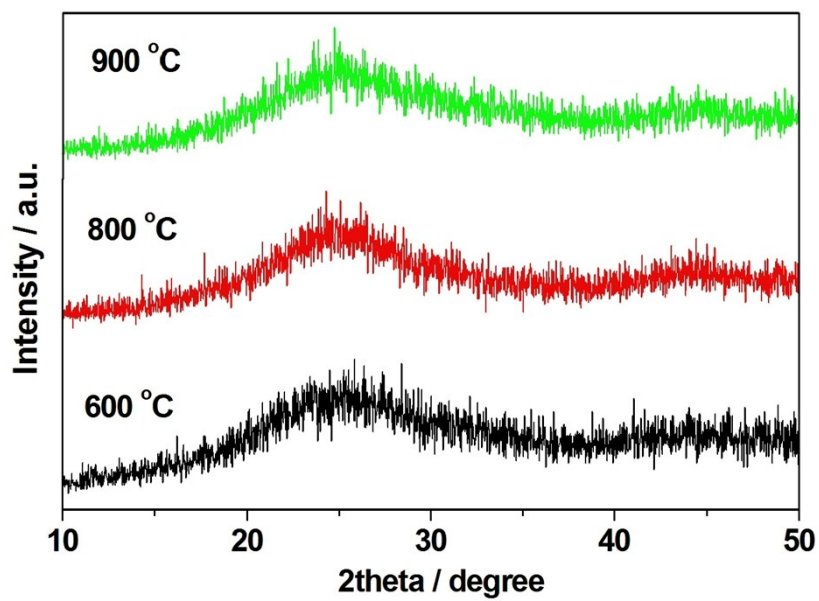

**Figure S10** XRD patterns of N,S co-doped pure carbon architectures obtained with different calcination temperatures: 600 °C, 800 °C and 900 °C.

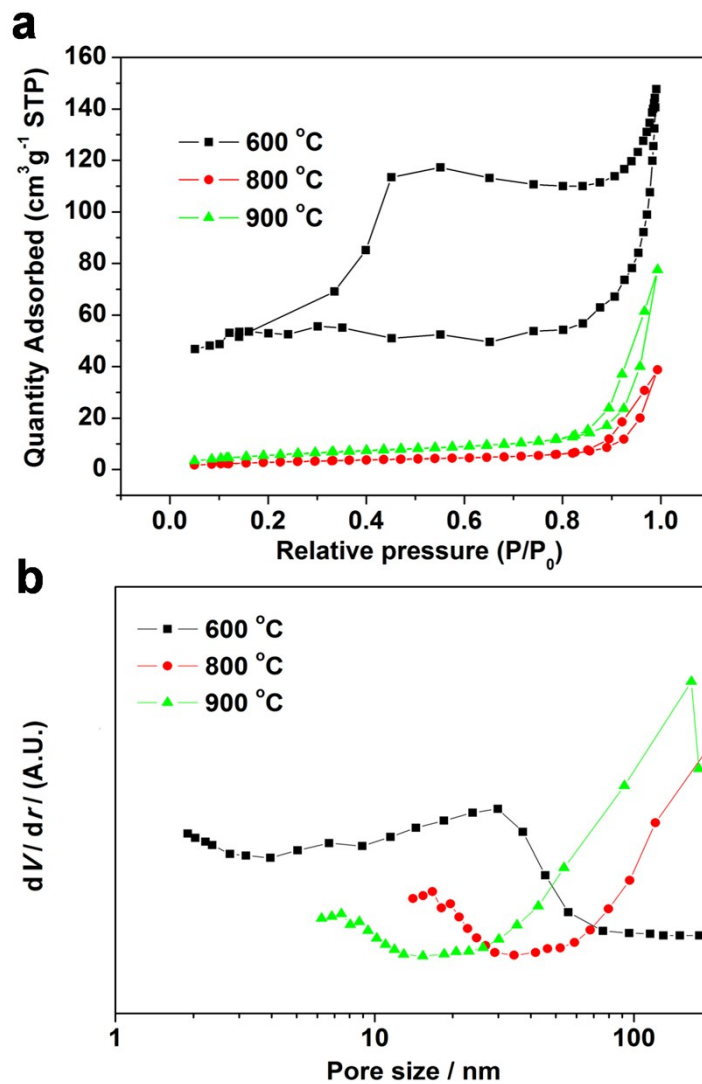

**Figure S11.** a) The corresponding  $N_2$  adsorption-desorption isotherms, and b) The corresponding pore size distribution curve of N,S co-doped pure carbon architectures obtained with different calcination temperatures: 600 °C, 800 °C and 900 °C.

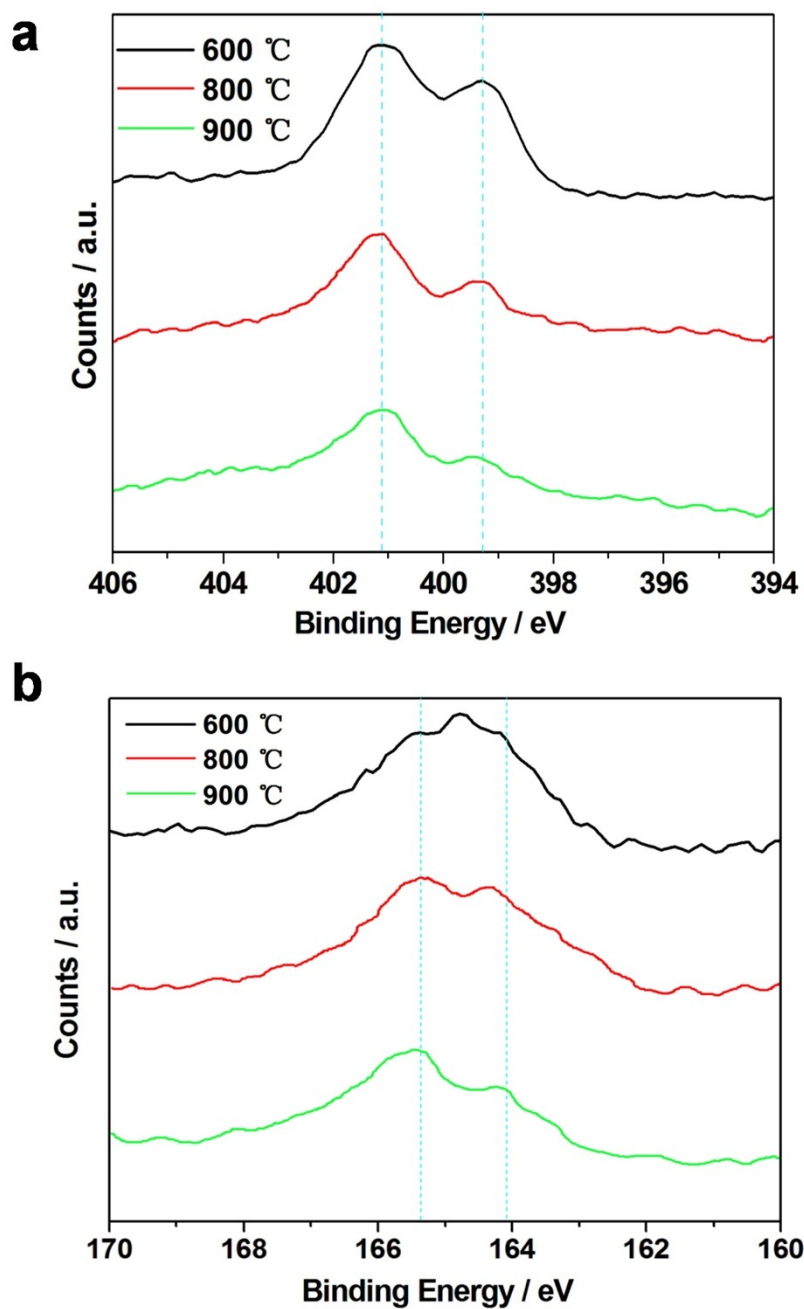

**Figure S12.** The high-resolution XPS spectra of N,S co-doped pure carbon architectures obtained with different calcination temperatures: 600 °C, 800 °C and 900 °C, a) N 1s, and b) S 2p.

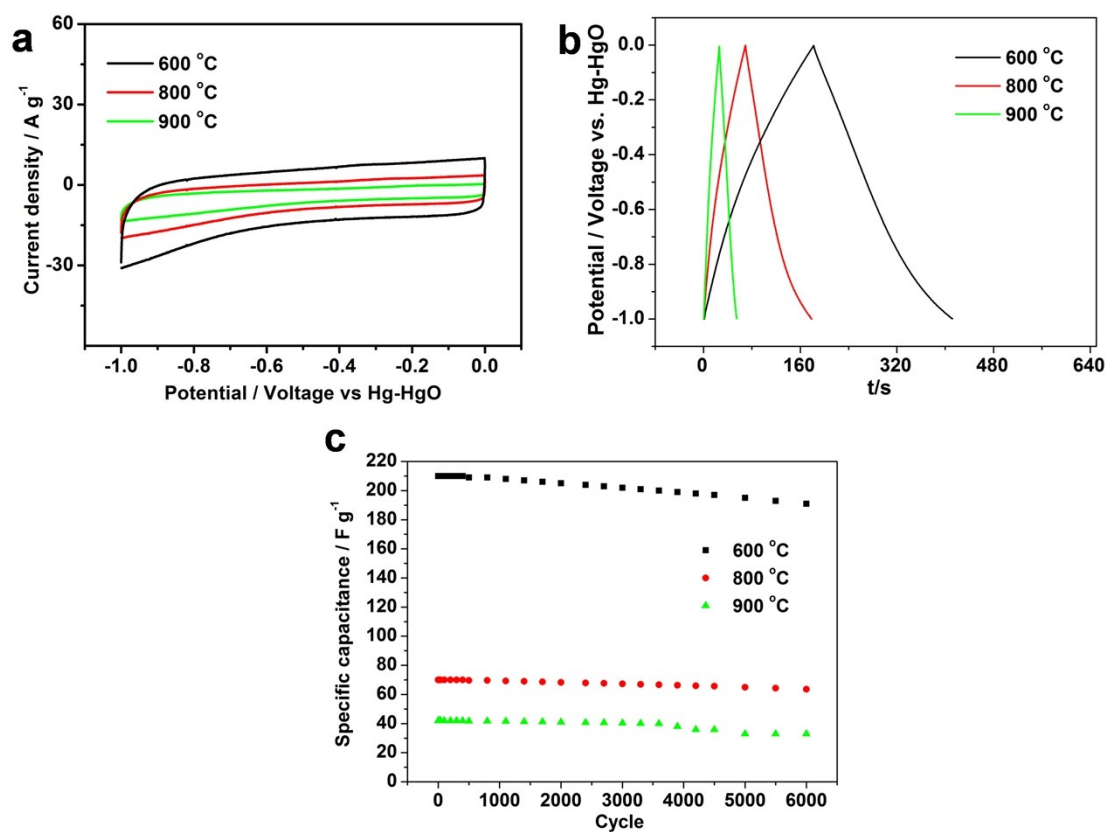

**Figure S13.** The as-prepared N,S co-doped pure carbon architectures (600 °C, 800 °C and 900 °C) electrodes in 3.0 M KOH at room temperature: a) Cyclic voltammetry within -1.0 to 0 V range at a scan rate of 20 mV·s<sup>-1</sup>, b) The galvanostatic discharge curves at 1.5 A g<sup>-1</sup>, and c) Cycling performance of the device at 3.0 A g<sup>-1</sup> for 6000 cycles.

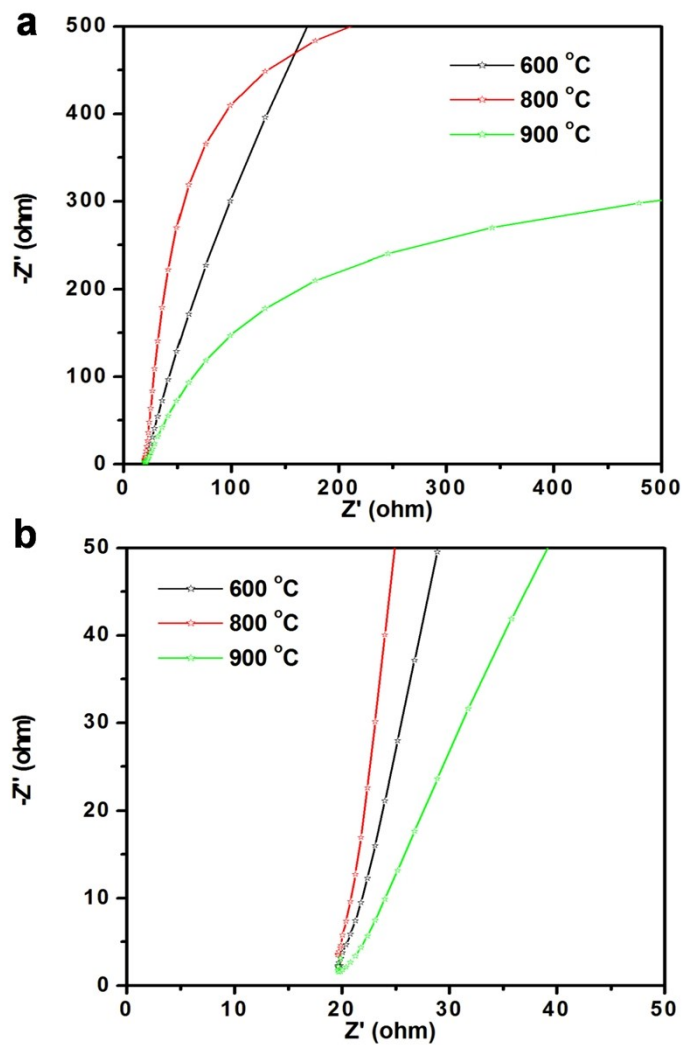

**Figure S14.** Electrochemical impedance spectra (EIS) image of the the as-prepared N,S co-doped pure carbon architectures (600 °C, 800 °C and 900 °C) electrodes in 3.0 M KOH, a) 0-500 Ohm, and b) 0-50 Ohm.



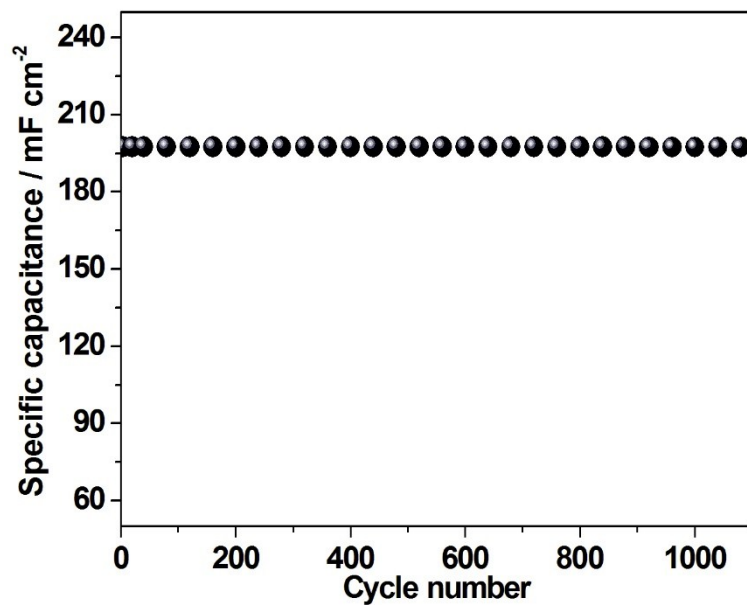

**Figure S15.** The mechanical stability (1000 cycles of bending 90° at 8.0 Am cm<sup>-2</sup>) of the NS-C-CoSiO//Activated carbon flexible solid-state asymmetric supercapacitors.

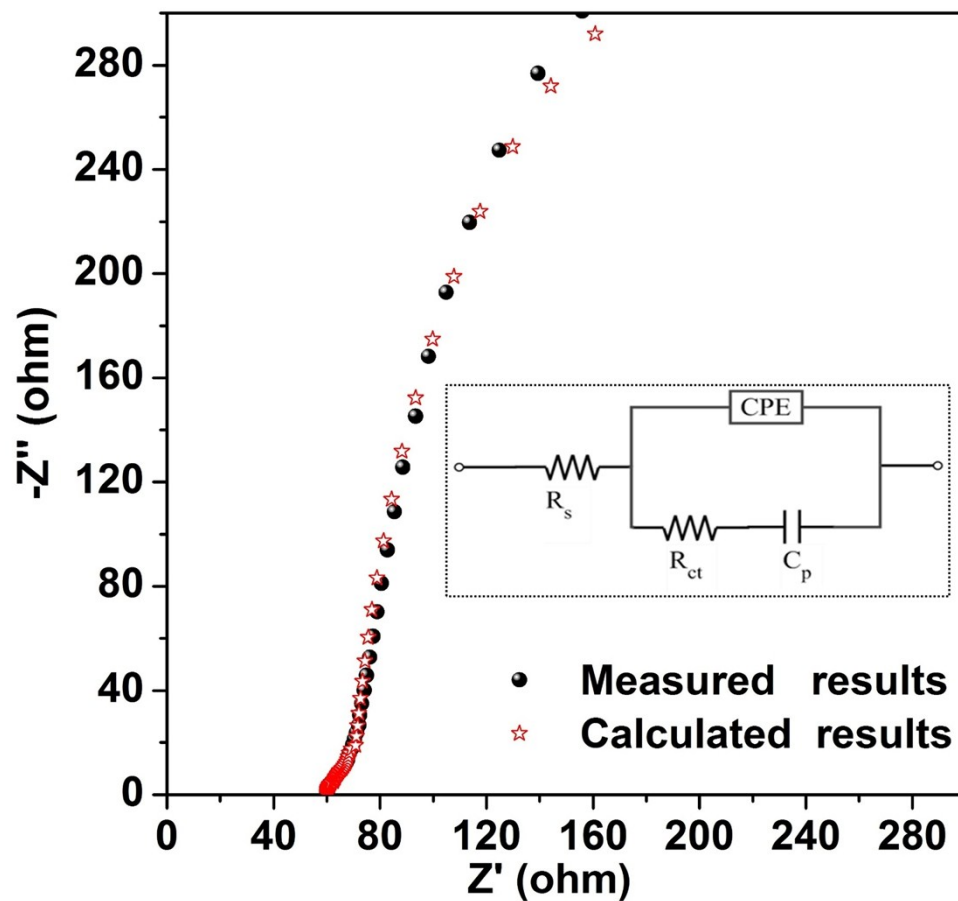

**Figure S16.** Electrochemical impedance spectra (EIS) image of the NS-C-CoSiO // activated carbons device.

**Table S1.** The Co/Si weight% is further analyzed and confirmed by inductively coupled plasma-atomic emission spectrometry (ICP-AES), and the atom ratio of Co/Si is 3.01:2.

| <b>Element</b> | <b>W/%</b> |
|----------------|------------|
| Co             | 22.3       |
| Si             | 7.1        |

**Table S2.** Some previous Co-based nanomaterials for supercapacitor in three-electrode system.<sup>[1-21]</sup>

| <b>Micro/nanostructures</b>                                                             | <b>Capacitance, 1 A g<sup>-1</sup> / F g<sup>-1</sup></b> | <b>Ref.</b>             |
|-----------------------------------------------------------------------------------------|-----------------------------------------------------------|-------------------------|
| $\beta$ -Co(OH) <sub>2</sub> single layer                                               | 2028                                                      | 1                       |
| Ni <sub>x</sub> Co-OH/GO sheets                                                         | 1540                                                      | 2                       |
| Co <sub>3</sub> O <sub>4</sub> thin sheets                                              | 1500                                                      | 3                       |
| Ni-Co-S nanoparticles                                                                   | 1492                                                      | 4                       |
| The MnO <sub>2</sub> -NPs@Co/C                                                          | 1050                                                      | 5                       |
| NiCo <sub>2</sub> O <sub>4</sub> /GO composites                                         | 1211.25                                                   | 6                       |
| LiCoO <sub>2</sub> particles                                                            | 1050                                                      | 7                       |
| NiCo <sub>2</sub> S <sub>4</sub> ball-in-ball hollow spheres                            | 1036                                                      | 8                       |
| Ni <sub>x</sub> Co <sub>3-x</sub> O <sub>4</sub> nanoparticles                          | 800                                                       | 9                       |
| CoFS sheets                                                                             | 711.3                                                     | 10                      |
| Co <sub>3</sub> O <sub>4</sub> nanotubes                                                | 647                                                       | 11                      |
| CoCO <sub>3</sub> /CoO/carbon cloth                                                     | 510                                                       | 12                      |
| Mesoporous Co <sub>3</sub> O <sub>4</sub> nanoflakes                                    | 450                                                       | 13                      |
| Co <sub>3</sub> O <sub>4</sub> @CNT/polyindole composite                                | 442.5                                                     | 14                      |
| Co <sub>2</sub> P nanoflake/carbon cloth                                                | 430                                                       | 15                      |
| Co <sub>2</sub> (OH) <sub>2</sub> CO <sub>3</sub> /activated carbon                     | 301.44                                                    | 16                      |
| Co <sub>0.85</sub> Se//N-PCNs                                                           | 290                                                       | 17                      |
| $\alpha$ -Co(OH) <sub>2</sub> /carbon nanofoam                                          | 210                                                       | 18                      |
| CoMoO <sub>4</sub> nanospheres                                                          | 170                                                       | 19                      |
| Layered (Ni,Co) <sub>3</sub> Si <sub>2</sub> O <sub>5</sub> (OH) <sub>4</sub>           | 150                                                       | 20                      |
| Hollow porous Co <sub>3</sub> O <sub>4</sub> nanospheres                                | 150                                                       | 21                      |
| <b><i>3D mesoporous C-Co<sub>3</sub>Si<sub>2</sub>O<sub>5</sub>(OH)<sub>4</sub></i></b> | <b><i>1600</i></b>                                        | <b><i>This work</i></b> |

**Table S3.** The N and S content of as-prepared N,S co-doped pure carbon architectures

(600 °C, 800 °C and 900 °C).

|            | <b>N wt %</b> | <b>S wt %</b> |
|------------|---------------|---------------|
| Sample-600 | 2.7           | 1.8           |
| Sample-800 | 1.5           | 0.7           |
| Sample-900 | 0.8           | 0.4           |

**Table S4.** The N/C and S/C atomic ratio of as-prepared N,S co-doped pure carbon architectures (600 °C, 800 °C and 900 °C).

|            | <b>N/C(%)</b> | <b>S/C(%)</b> |
|------------|---------------|---------------|
| Sample-600 | 2.4           | 0.7           |
| Sample-800 | 1.3           | 0.3           |
| Sample-900 | 0.7           | 0.2           |

**Table S5.** The percentages of the graphitic-N, pyridinic-N, and pyrrolic-N of as-prepared N,S co-doped pure carbon architectures (600 °C, 800 °C and 900 °C).

|            | <b>Pyridinic-N(%)</b> | <b>Pyrrolic-N(%)</b> | <b>Graphitic-N(%)</b> |
|------------|-----------------------|----------------------|-----------------------|
| Sample-600 | 35.2                  | 33.8                 | 31                    |
| Sample-800 | 33.9                  | 35.6                 | 30.5                  |
| Sample-900 | 31.6                  | 34.8                 | 33.6                  |

## References

- [1] S. Gao, Y. F. Sun, F. C. Lei, L. Liang, J. W. Liu, W. T. Bi, B. C. Pan, Y. Xie, *Angew. Chem. Int. Ed.*, 53 (2014) 12789.
- [2] H. Ma, J. He, D. B. Xiong, J. S. Wu, Q. Q. Li, V. Dravid, Y. F. Zhao, *ACS Appl. Mater. Inte.*, 8 (2016) 1992.
- [3] Y. Q. Jiang, L.Y. Chen, H. Q. Zhang, Q. Zhang, W. F. Chen, J. K. Zhu, D. M. Song, *Chem. Eng. J.*, 292 (2016) 1.
- [4] J. Yang, C. Yu, X. M. Fan, S. X. Liang, S. F. Li, H. W. Huang, Z. Ling, C. Hao, J. S. Qiu, *Energy Environ. Sci.*, 9 (2016) 1299.
- [5] J. Zhi, O. Reiser, F. Q. Huang, *ACS Appl. Mater. Inte.*, 8 (2016) 8452.
- [6] Y. J. Xu, L. C. Wang, P. Q. Cao, C. L. Cai, Y. B. Fu, X. H. Ma, *J. Power Sources*, 306 (2016) 742.
- [7] Y. N. Xu, Y. Y. Dong, X. Han, X. F. Wang, Y. J. Wang, L. F. Jiao, H. T. Yuan, *ACS Sustainable Chem. Eng.* 3 (2015) 2435.
- [8] L. F. Shen, L. Yu, H. B. Wu, X. Y. Yu, X. G. Zhang, X. W. (David) Lou, *Nat. Commun.*, (2015) DOI:10.1038/ncomms7694.
- [9] S. R. Chen, M. Xue, Y. Q. Li, Y. Pan, L. K. Zhu, S. L. Qiu, *J. Mater. Chem. A*, 3 (2015) 20145.
- [10] W. Yang, Y. Y. Feng, N. Wang, H. Y. Yuan, D. Xiao, *J. Alloy. Compd.*, 644 (2015) 836.
- [11] H. Li, F. Yue, C. Yang, P. Qiu, P. Xue, Q. Xu, J. D Wang, *Ceram. Int.* 42 (2016) 3121.



- [12]J. Xu, S. Cheng, L. F. Yang, Y. Jiang, Z. J. Jiang, C. H. Yang, H. Zhang, M. L. Liu, *Nano Energy*, 11 (2015) 736.
- [13]A. G. Xiao, S. B. Zhou, C. G. Zuo, Y. B. Zhuan, X. Ding, *Mater. Res. Bull.* 60 (2014) 674.
- [14]X. Zhou, A. Q. Wang, Y. M. Pan, C. F. Yu, Y. Zou, Y. Zhou, Q. Chen, S. S. Wu, *J. Mater. Chem. A*, 3 (2015) 13011.
- [15]X. J. Chen, M. Cheng, D. Chen, R. M. Wang, *ACS Appl. Mater. Inte.* 8 (2016) 3892.
- [16]T. M. Masikhwa, J. K. Dangbegnon, A. Bello, M. J. Madito, D. Momodu, N. Manyala, *J. Phys. Chem. C*, 88 (2016) 60.
- [17]H. Peng, G. F. Ma, K. J. Sun, Z. G. Zhang, J. D. Li, X. Z. Zhou, Z. Q. Lei, *J. Power Sources*. 297 (2015) 351.
- [18]R. D. Noce, S. Eugenio, T. M. Silva, M. J. Carmezim, M. F. Montemor, *J. Power Sources*. 288 (2015) 234.
- [19]M. J. Barmi, M. M. Sundaram, *RSC Adv.* 6 (2016) 36152.
- [20]Q. Rong, L. L. Long, X. Zhang, Y. X. Huang, H. Q. Yu, *Appl. Energ.* 153 (2015) 63.
- [21]F. L. Meng, Z. G. Fang, Z. X. Li, W. W. Xu, M. J. Wang, Y. P. Liu, J. Zhang, W. R. Wang, D. Y. Zhao, X. H. Guo, *J. Mater. Chem. A*. 1 (2013) 7235.
